# Supplementary material for: Mining key genes related to root morphogenesis through genome-wide identification and expression analysis of RR gene family in citrus
Source: Frontiers journal article supplement (doi:10.3389/fpls.2022.1068961), 2022-11-22
Supplement: Image_2.pdf [file Image_2.pdf]

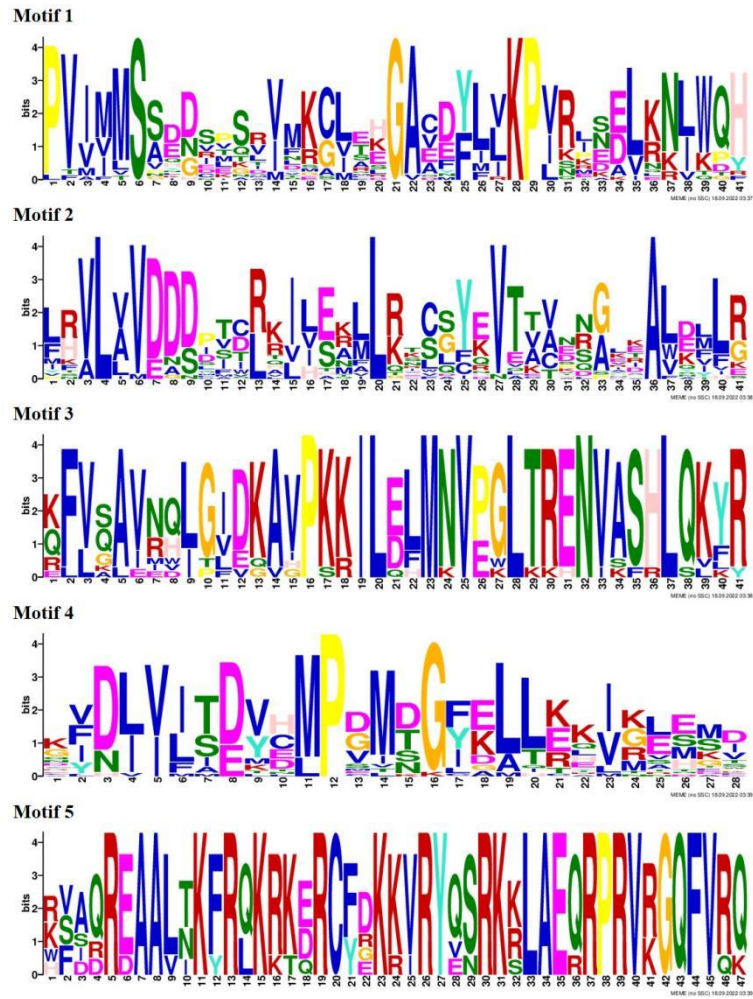

Figure S2 Conserved motifs of CcRRs identified by the online MEME program.
